# Supplementary material
Source: publisher figshare collection journal article supplement (https://sage.figshare.com/ndownloader/files/22217247)
Supplement: Supplementary file 1 [file 22217247]

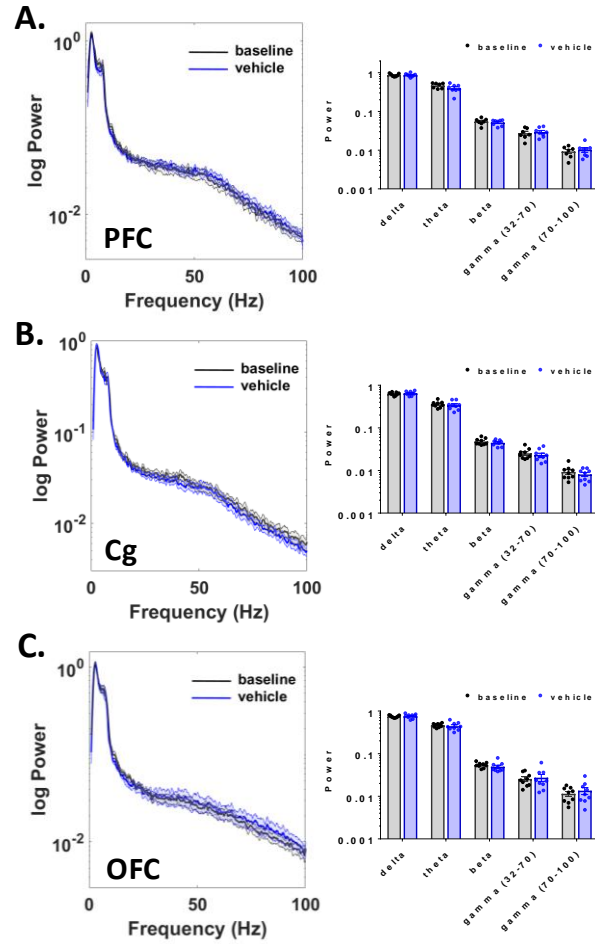

**Figure S1.** Comparison of group baselines and post-injection vehicle treatment in cortical regions. (a-c) Power spectra and quantification showing no differences at baseline versus post-injection in the vehicle group for any of the regions or frequencies. Post-injection data were taken from 2-minute epochs at 20 minutes post-injection.  $N = 7-9$  rats/region. Curves represent group means with jackknife estimates of the mean. Bars represent means  $\pm$  sem.

**Table S1.** Effect of vehicle treatment on 7-9 Hz theta coherence

| Pathway  | Baseline    | Vehicle      | <i>P</i> -value |
|----------|-------------|--------------|-----------------|
| PFC-HIP  | 0.579±0.045 | 0.582±0.031  | <i>P</i> =0.96  |
| PFC-BLA  | 0.637±0.036 | 0.645±0.025  | <i>P</i> =0.44  |
| PFC-THAL | 0.575±0.038 | 0.581±0.032  | <i>P</i> =0.89  |
| Cg-HIP   | 0.587±0.046 | 0.596±0.024  | <i>P</i> =0.87  |
| Cg-BLA   | 0.604±0.040 | 0.642±0.021  | <i>P</i> =0.47  |
| Cg-THAL  | 0.565±0.045 | 0.570±0.036  | <i>P</i> =0.77  |
| NAC-HIP  | 0.657±0.051 | 0.597±0.027  | <i>P</i> =0.32  |
| NAC-BLA  | 0.812±0.026 | 0.791±0.021  | <i>P</i> =0.83  |
| NAC-THAL | 0.607±0.035 | 0.622 ±0.044 | <i>P</i> =0.77  |

Values are mean ±SEM (n=7-9 animals)
